# Supplementary material
Source: PubMed Central journal article supplement (PMC4272216)

Figure S1

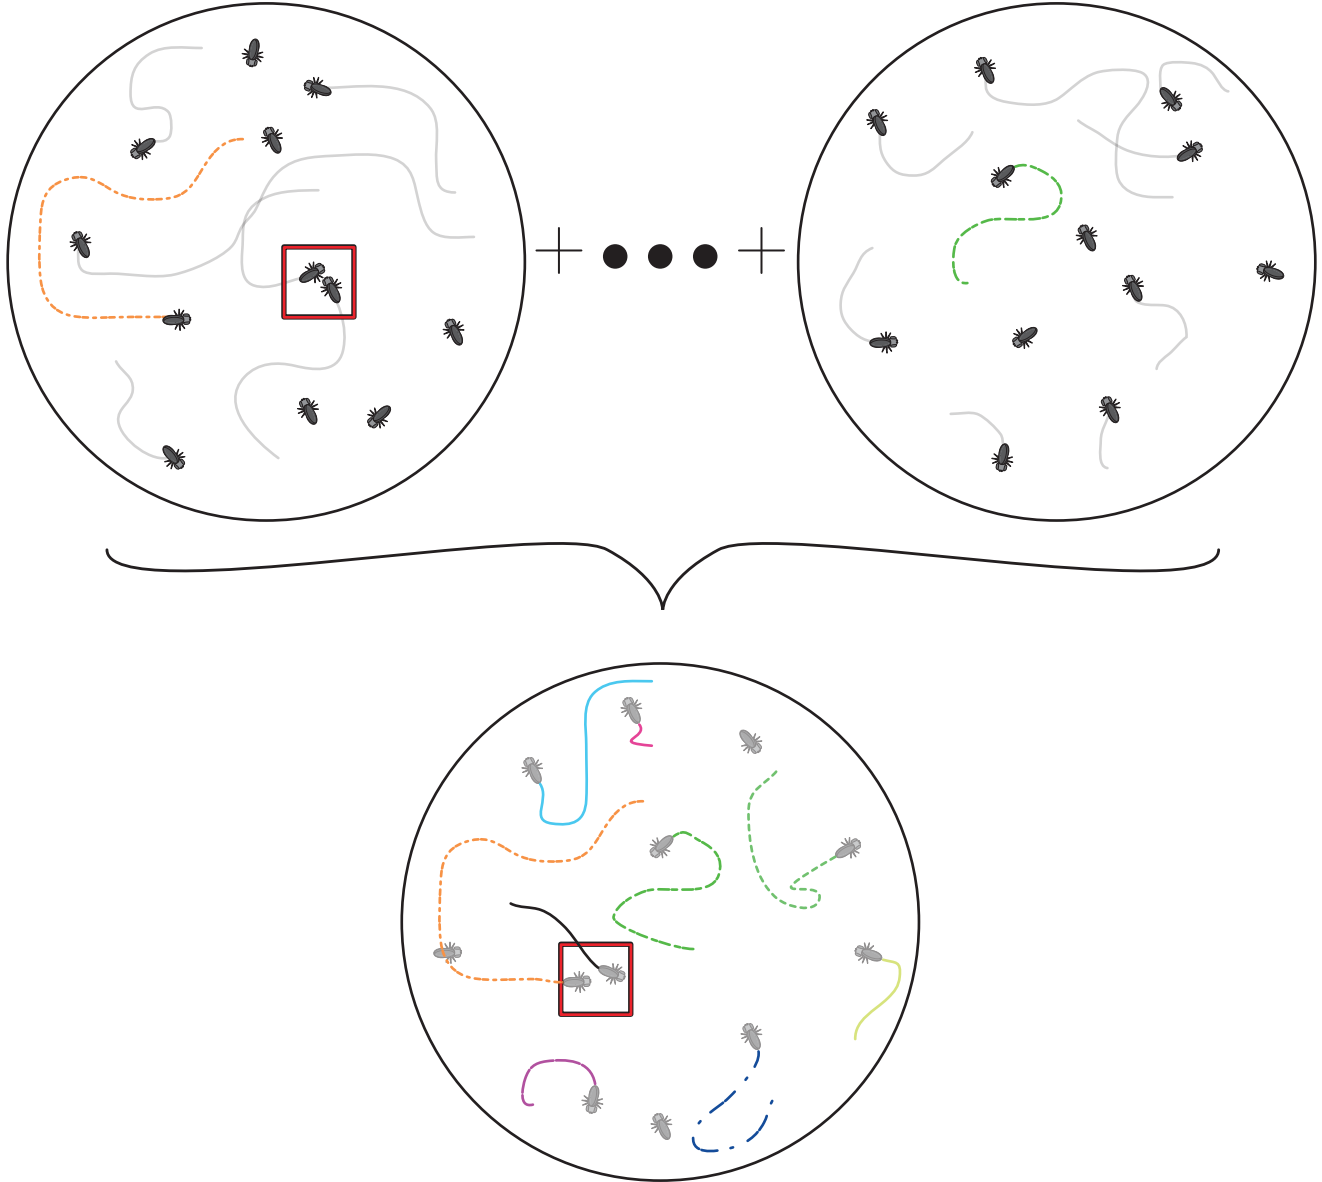

Figure S2

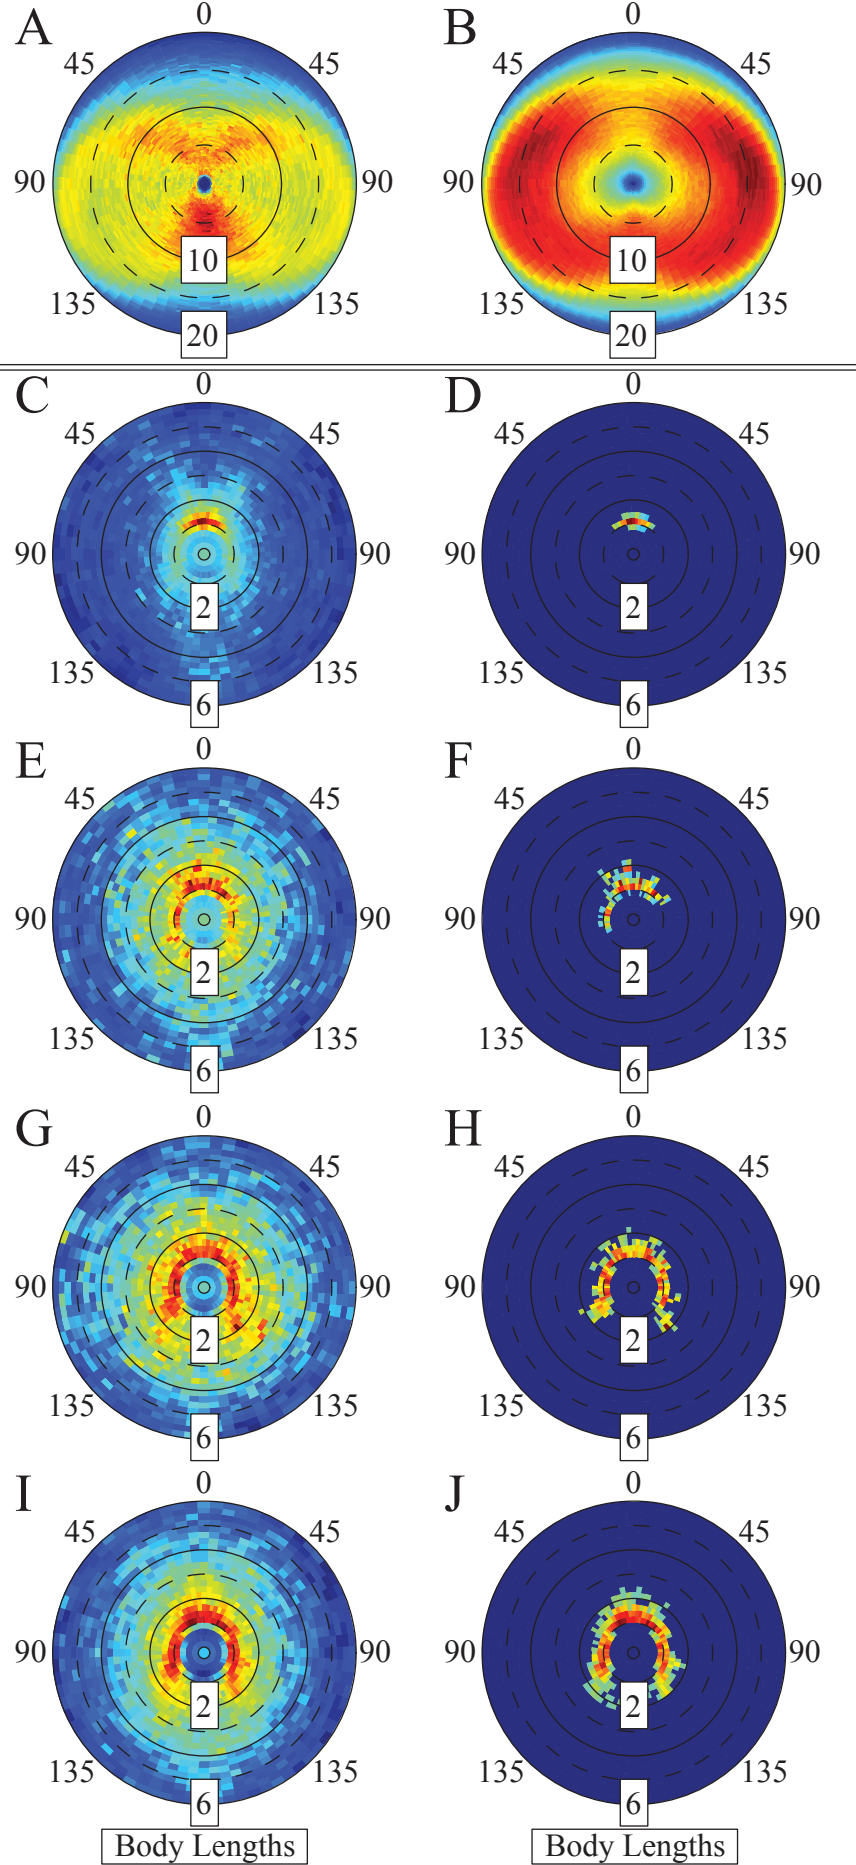

Figure S3

A

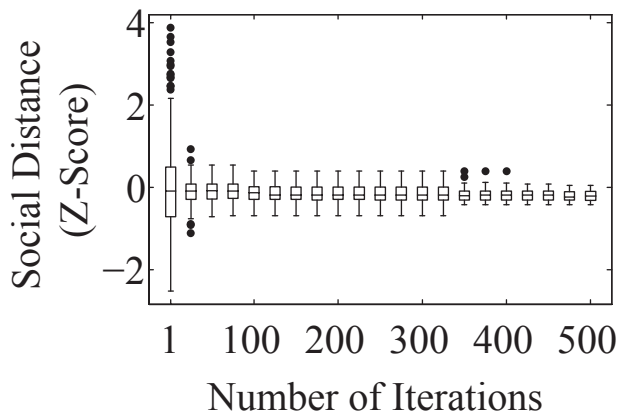

B

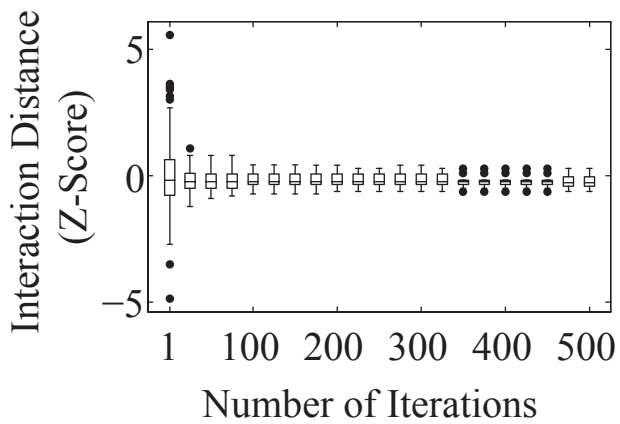

C

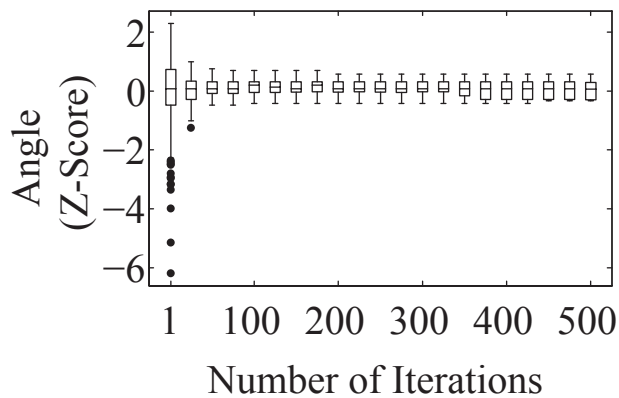

D

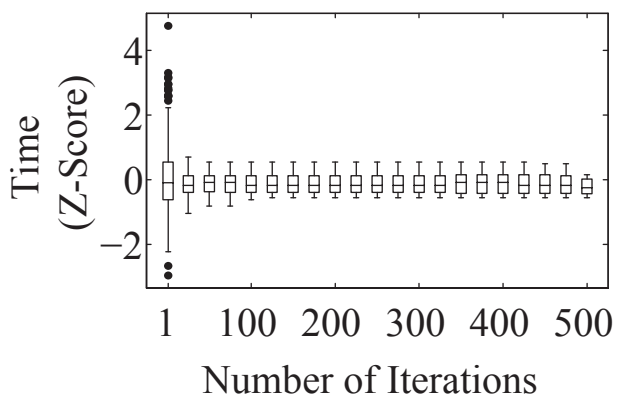

Figure S4

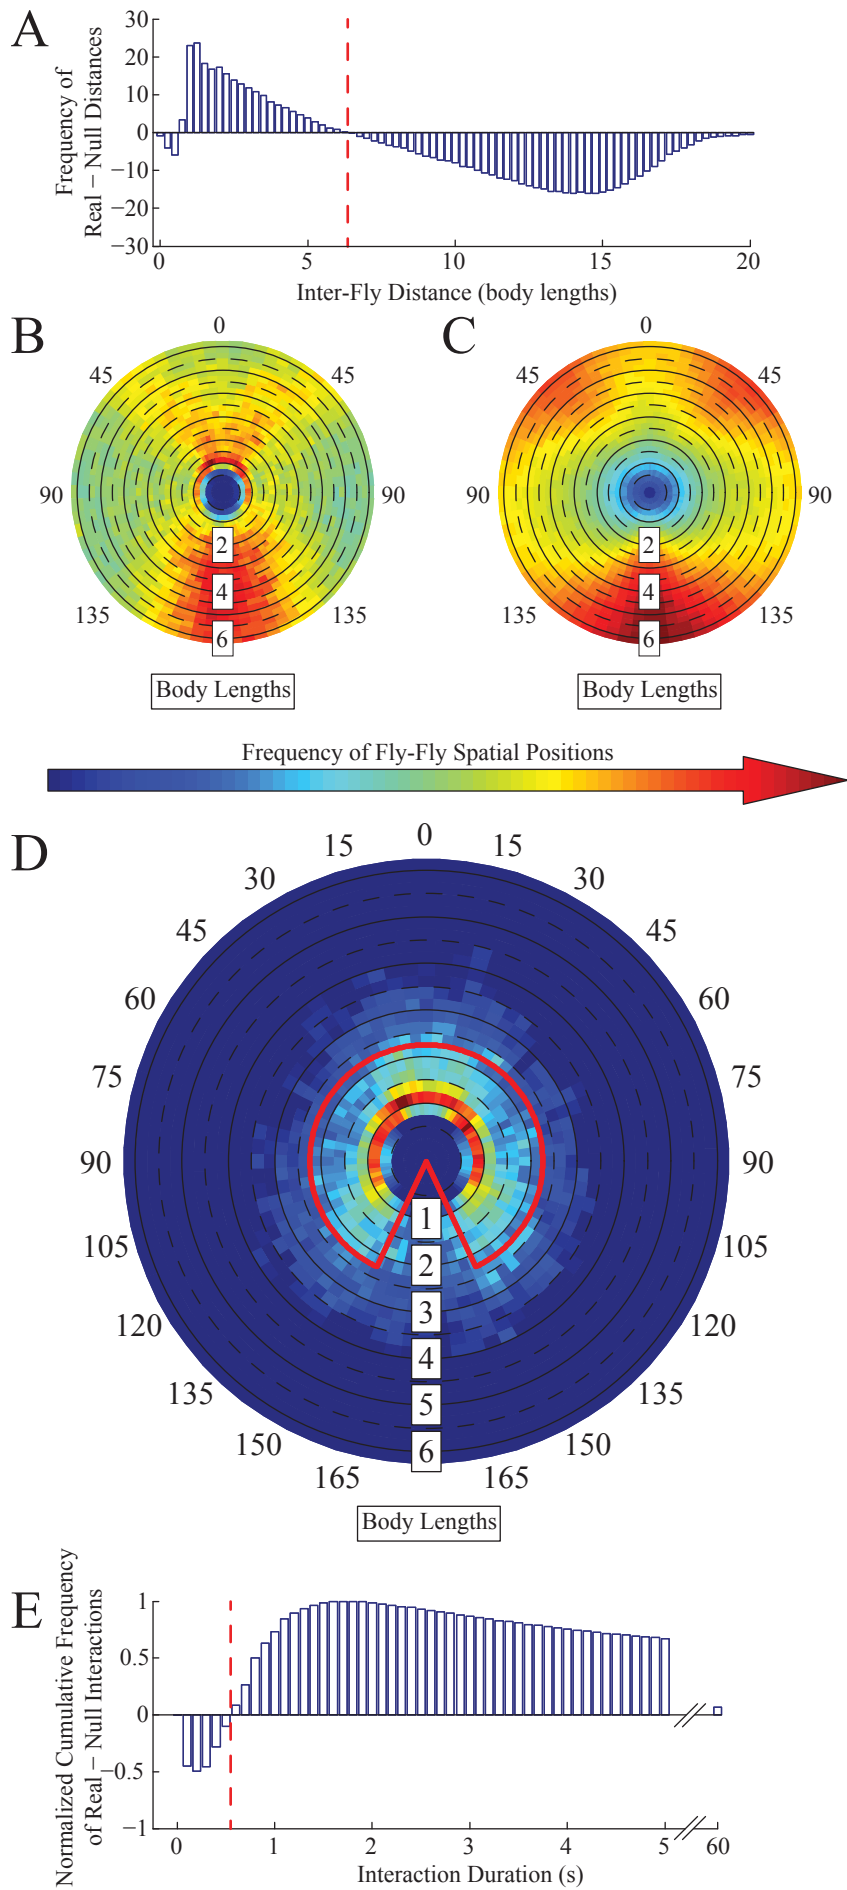

Figure S5

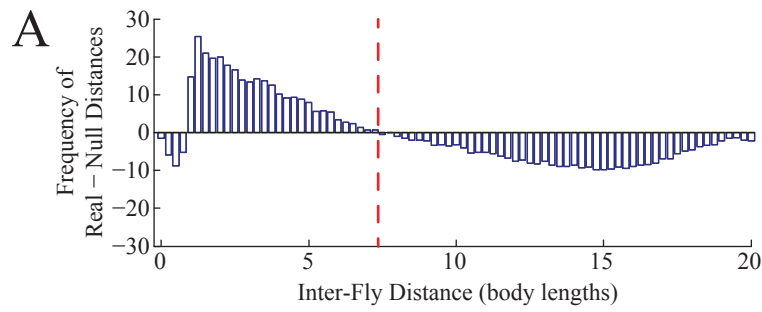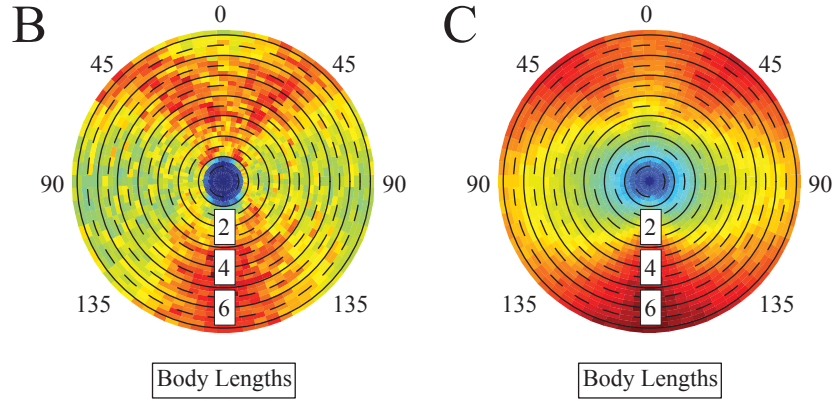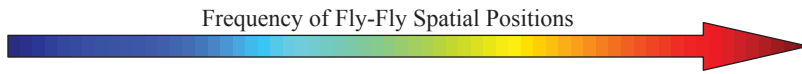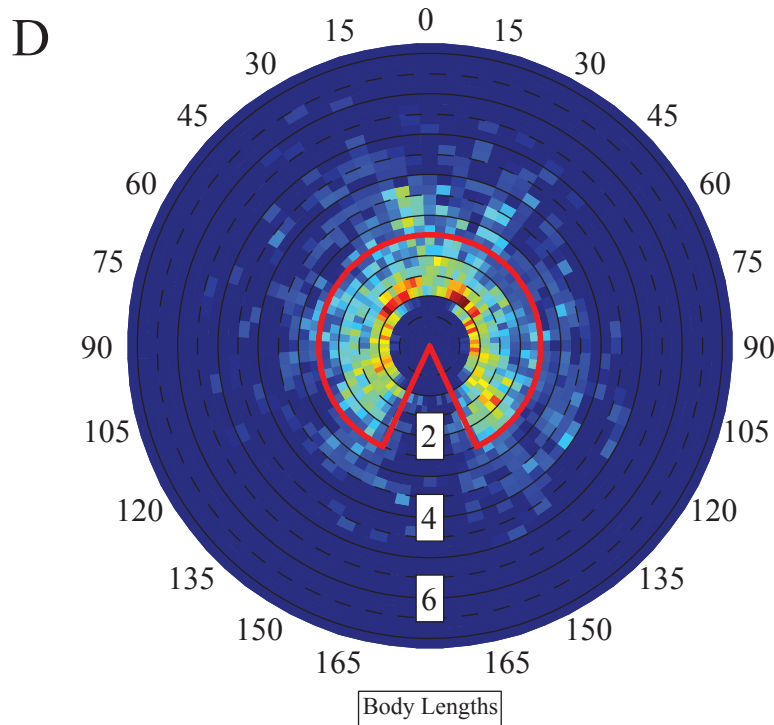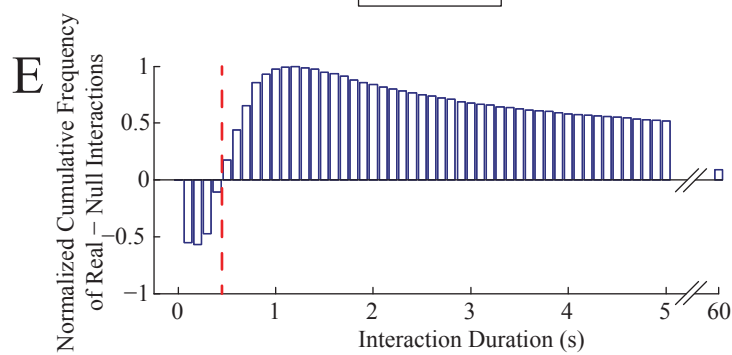

Figure S6

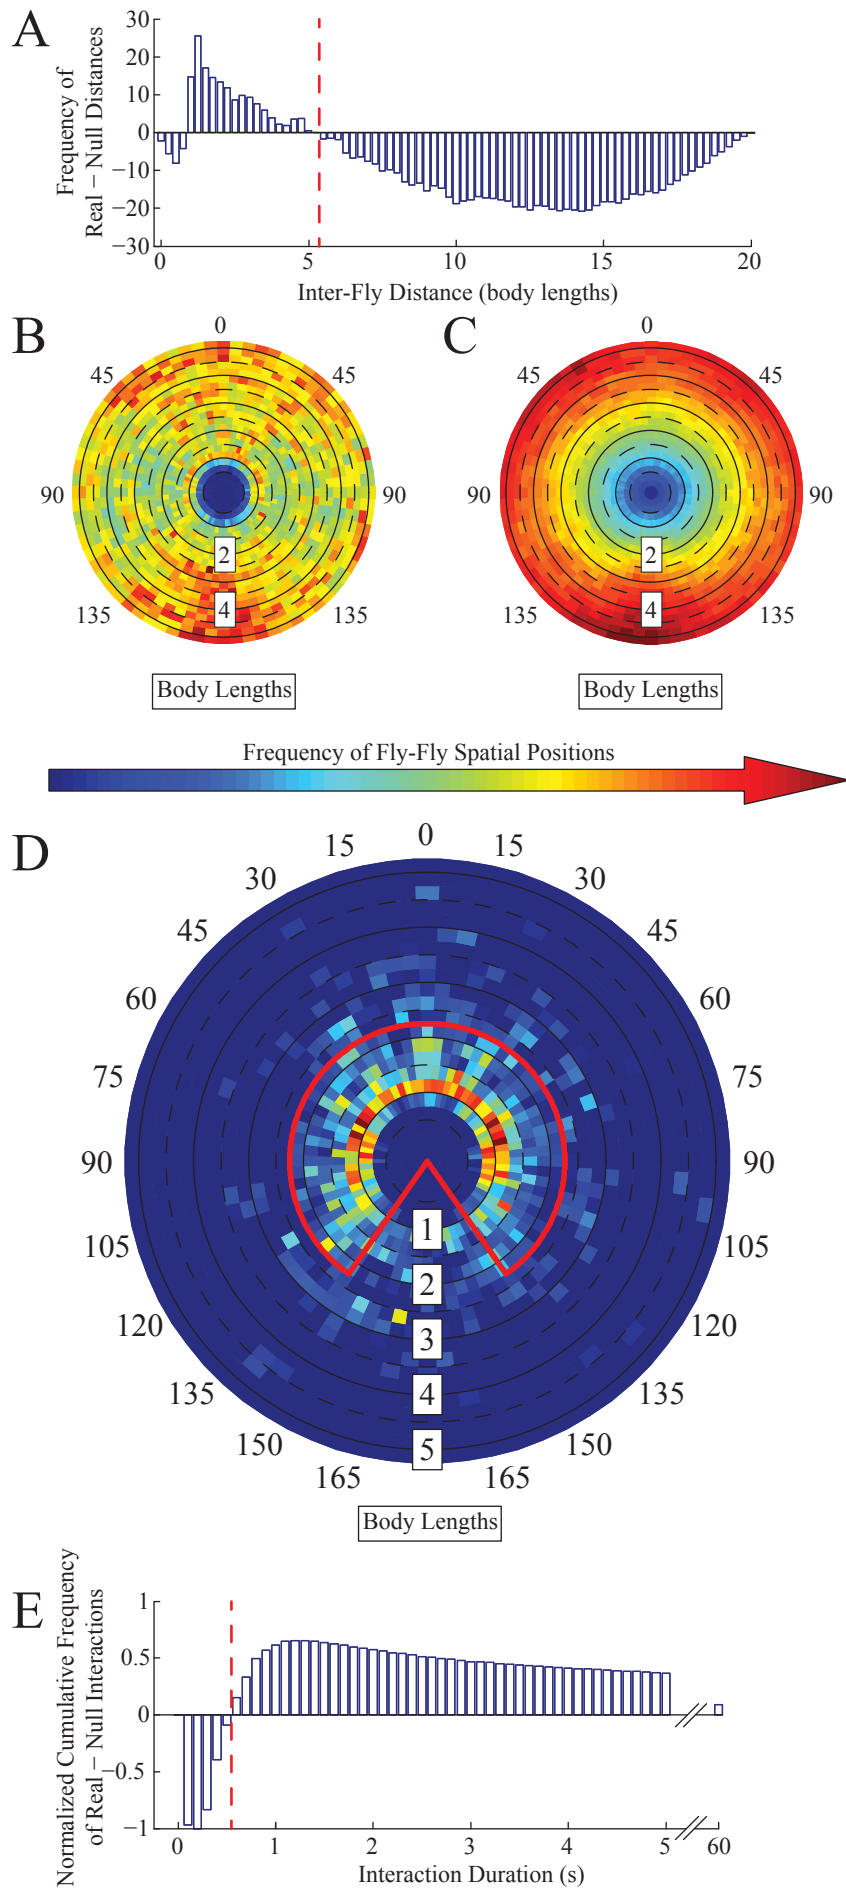

Figure S7

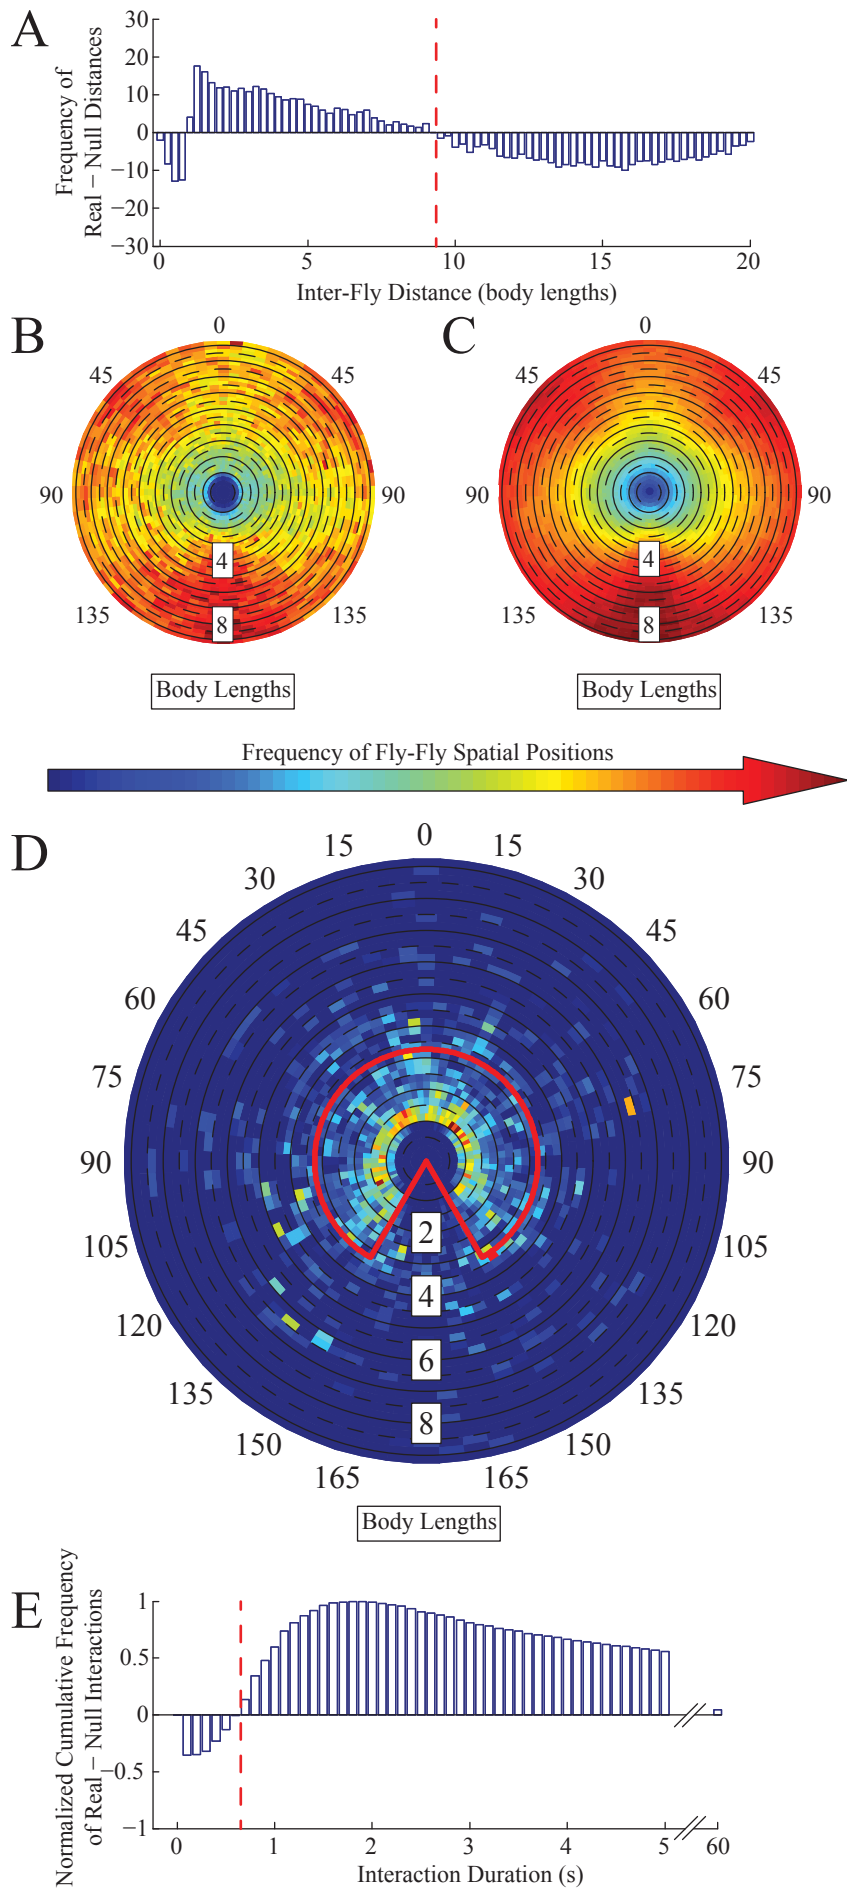

Figure S8

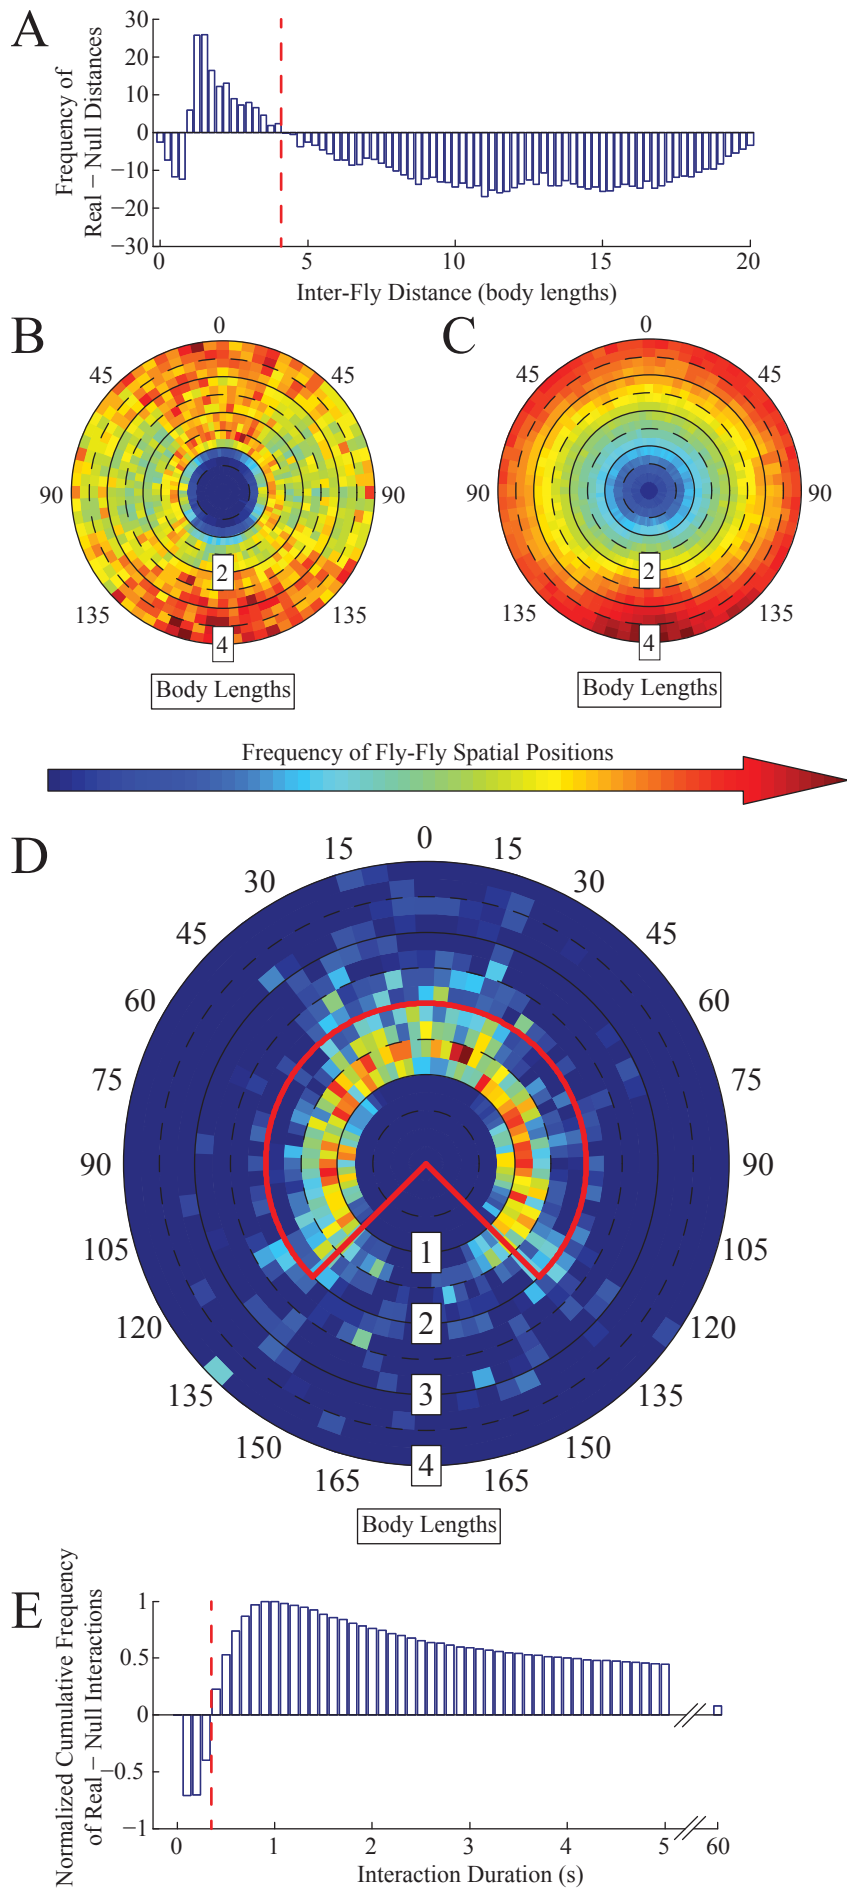



Figure S9

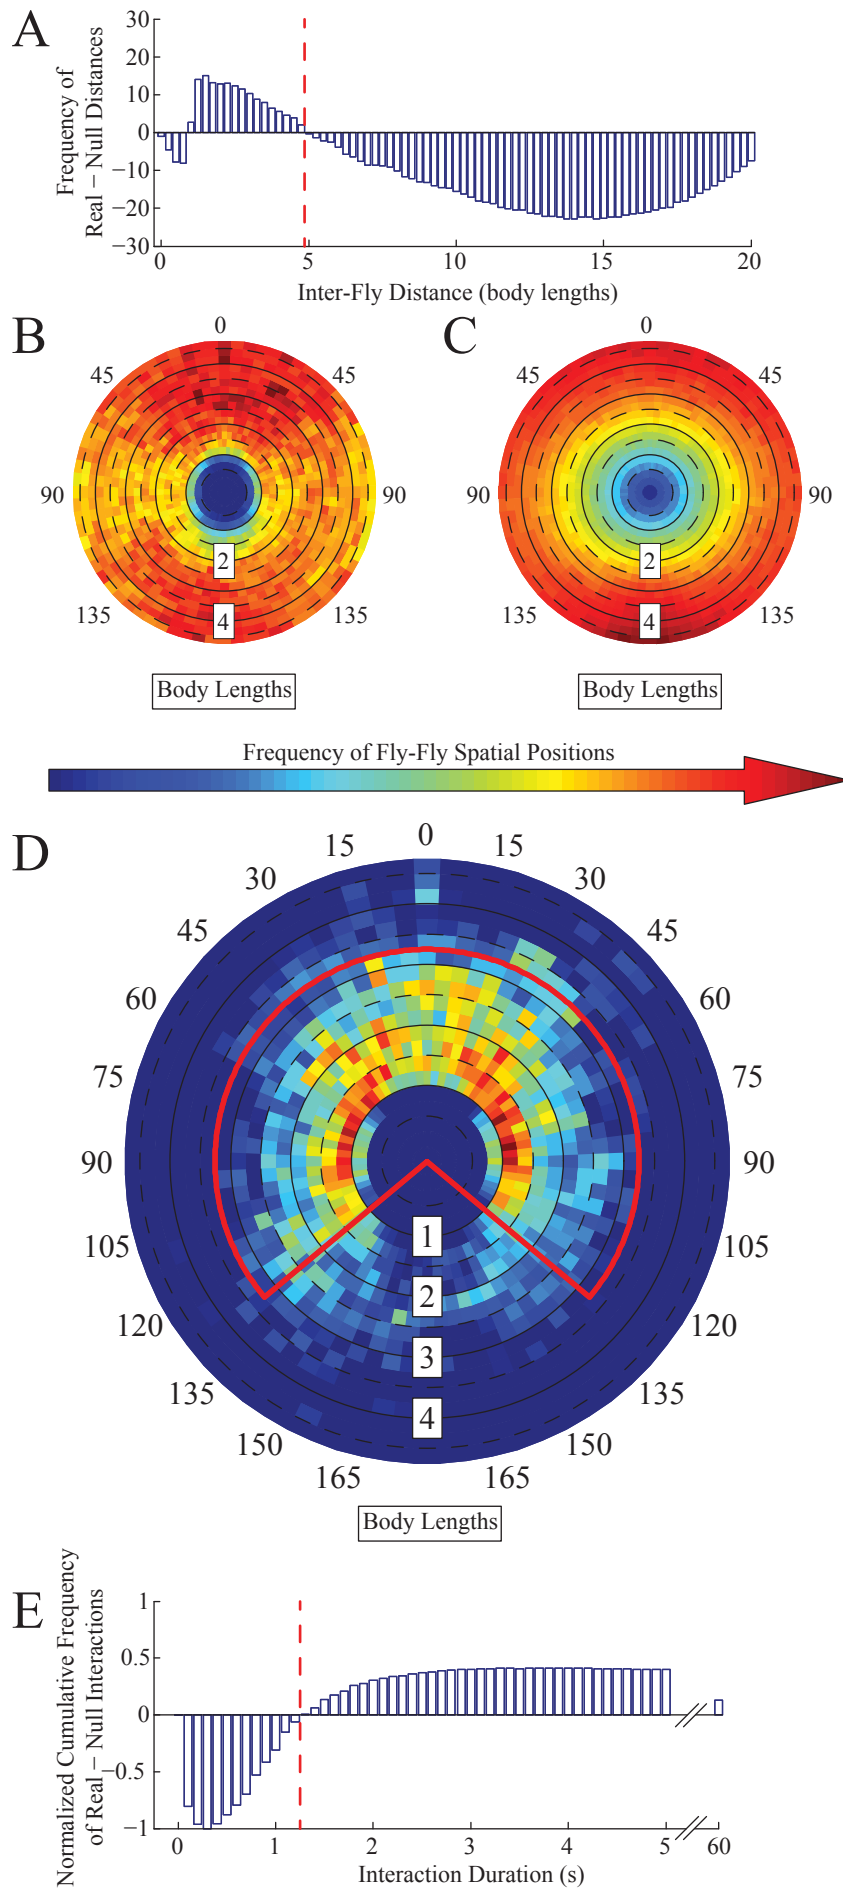

Figure S10

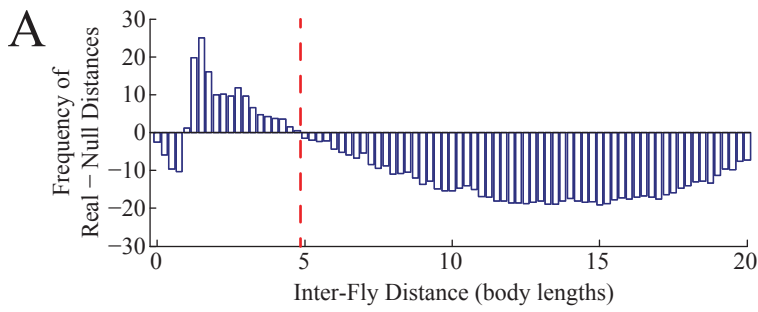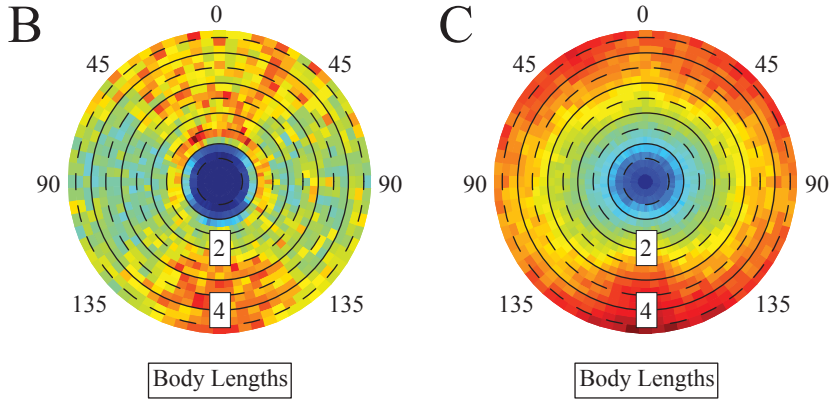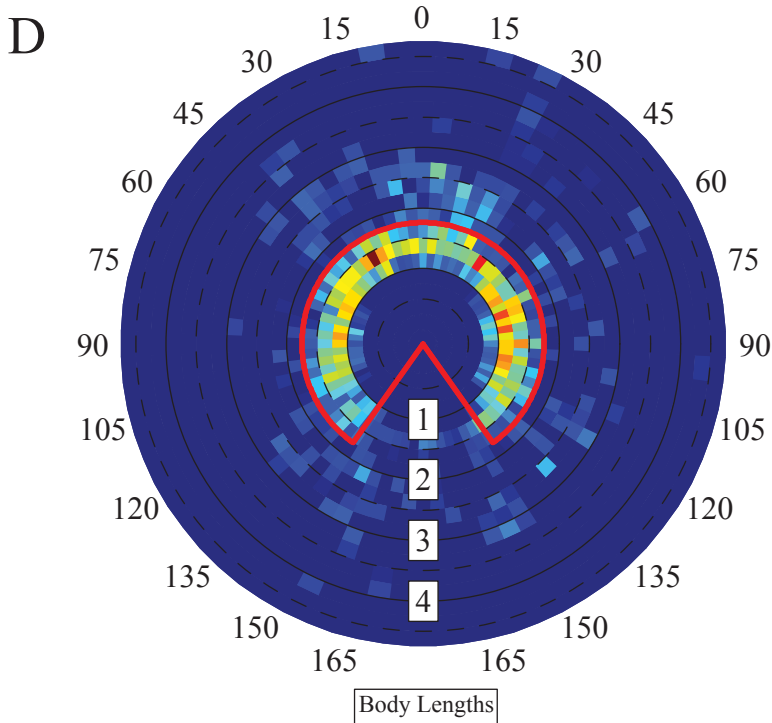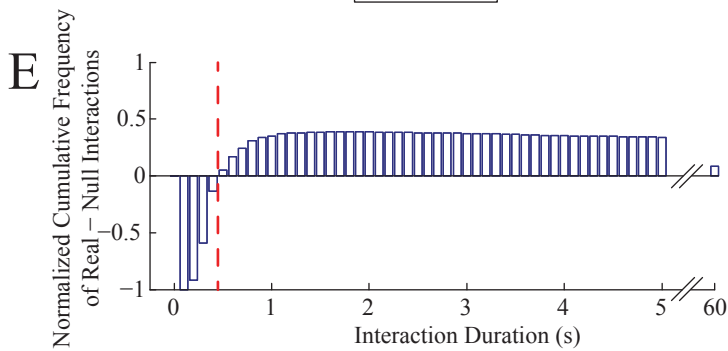

Figure S11

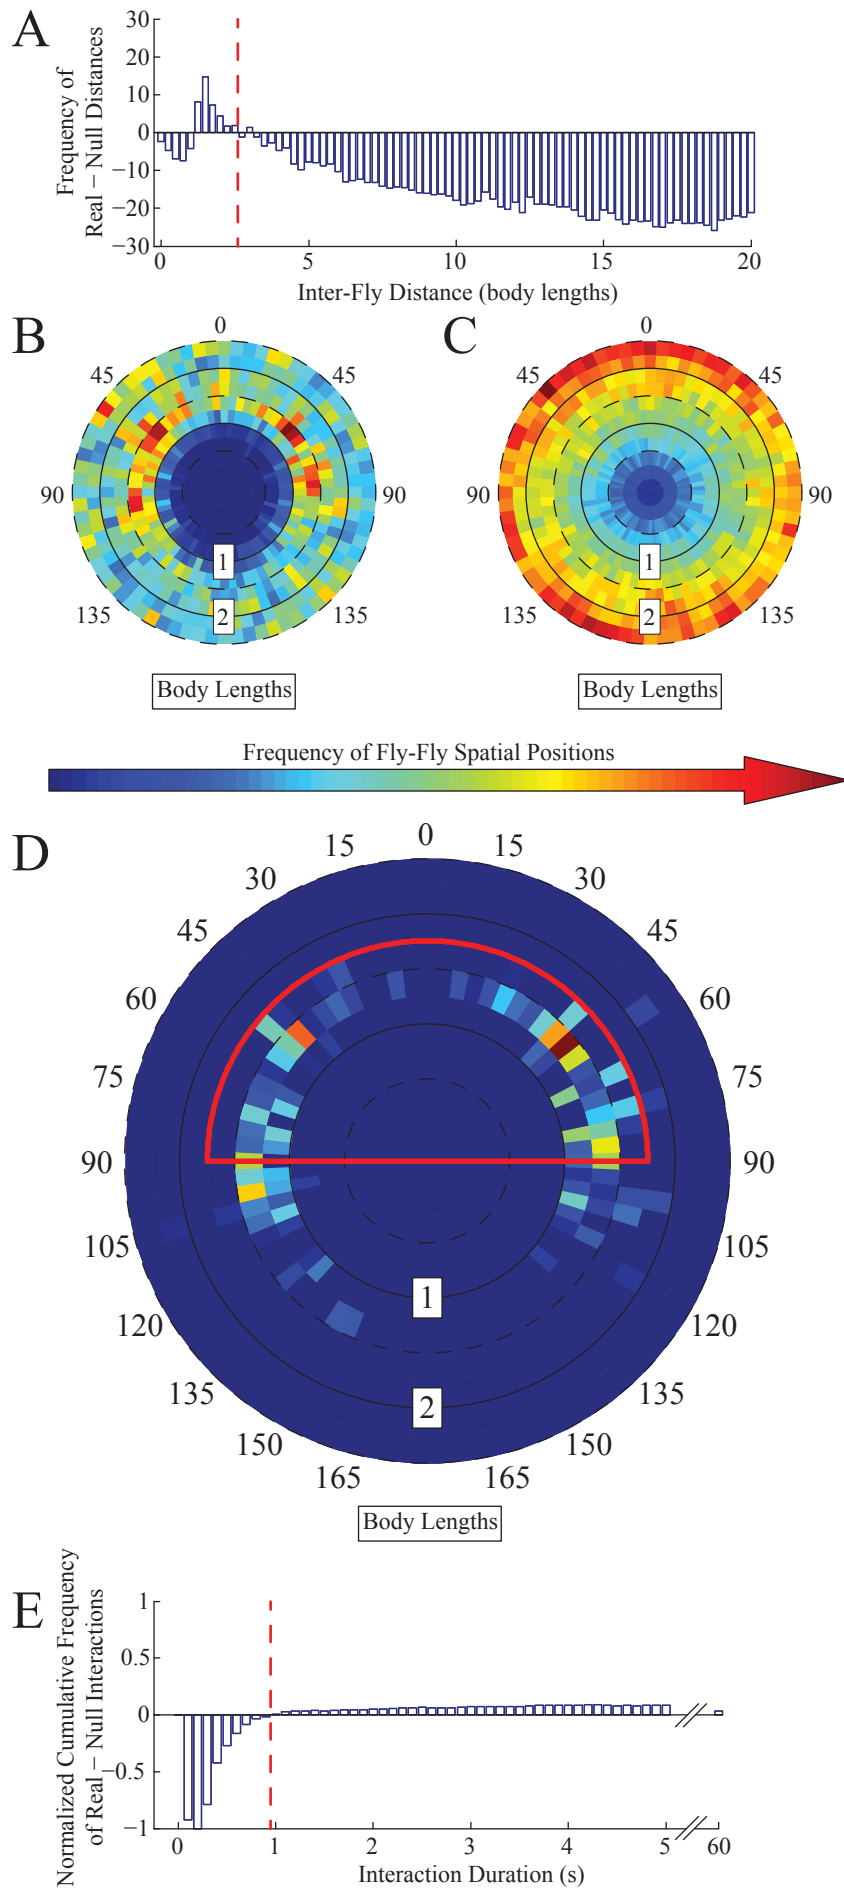

Figure S12

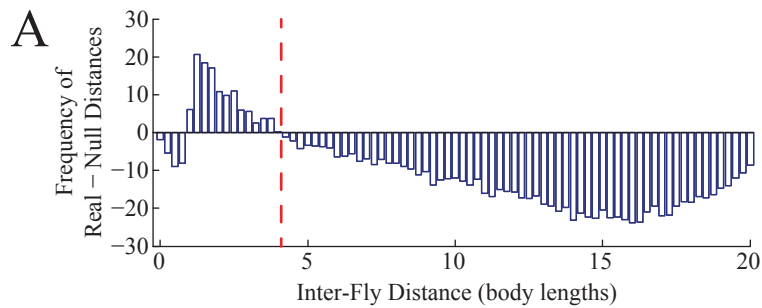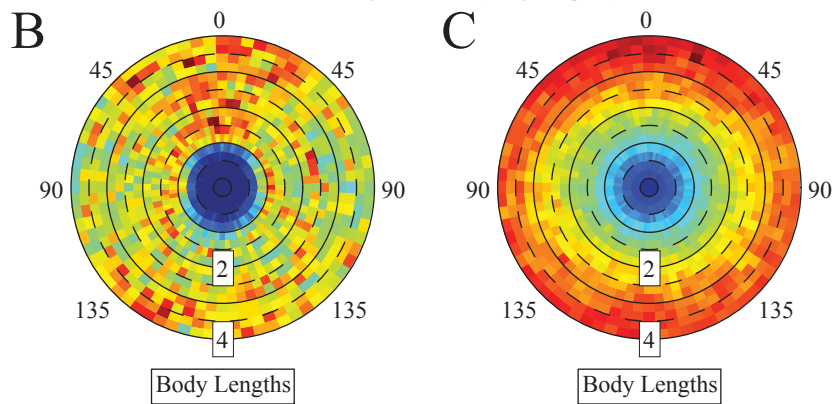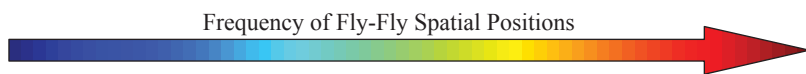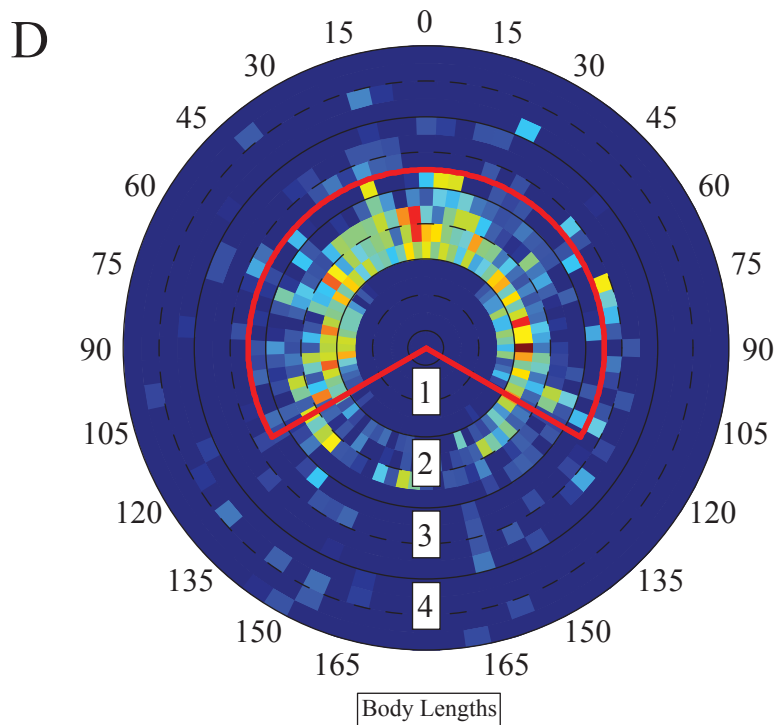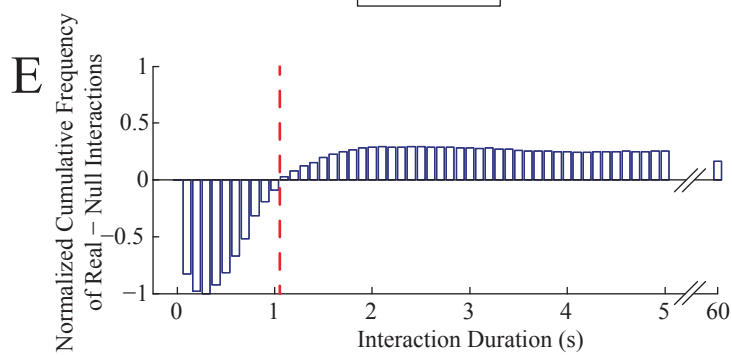

Figure S13

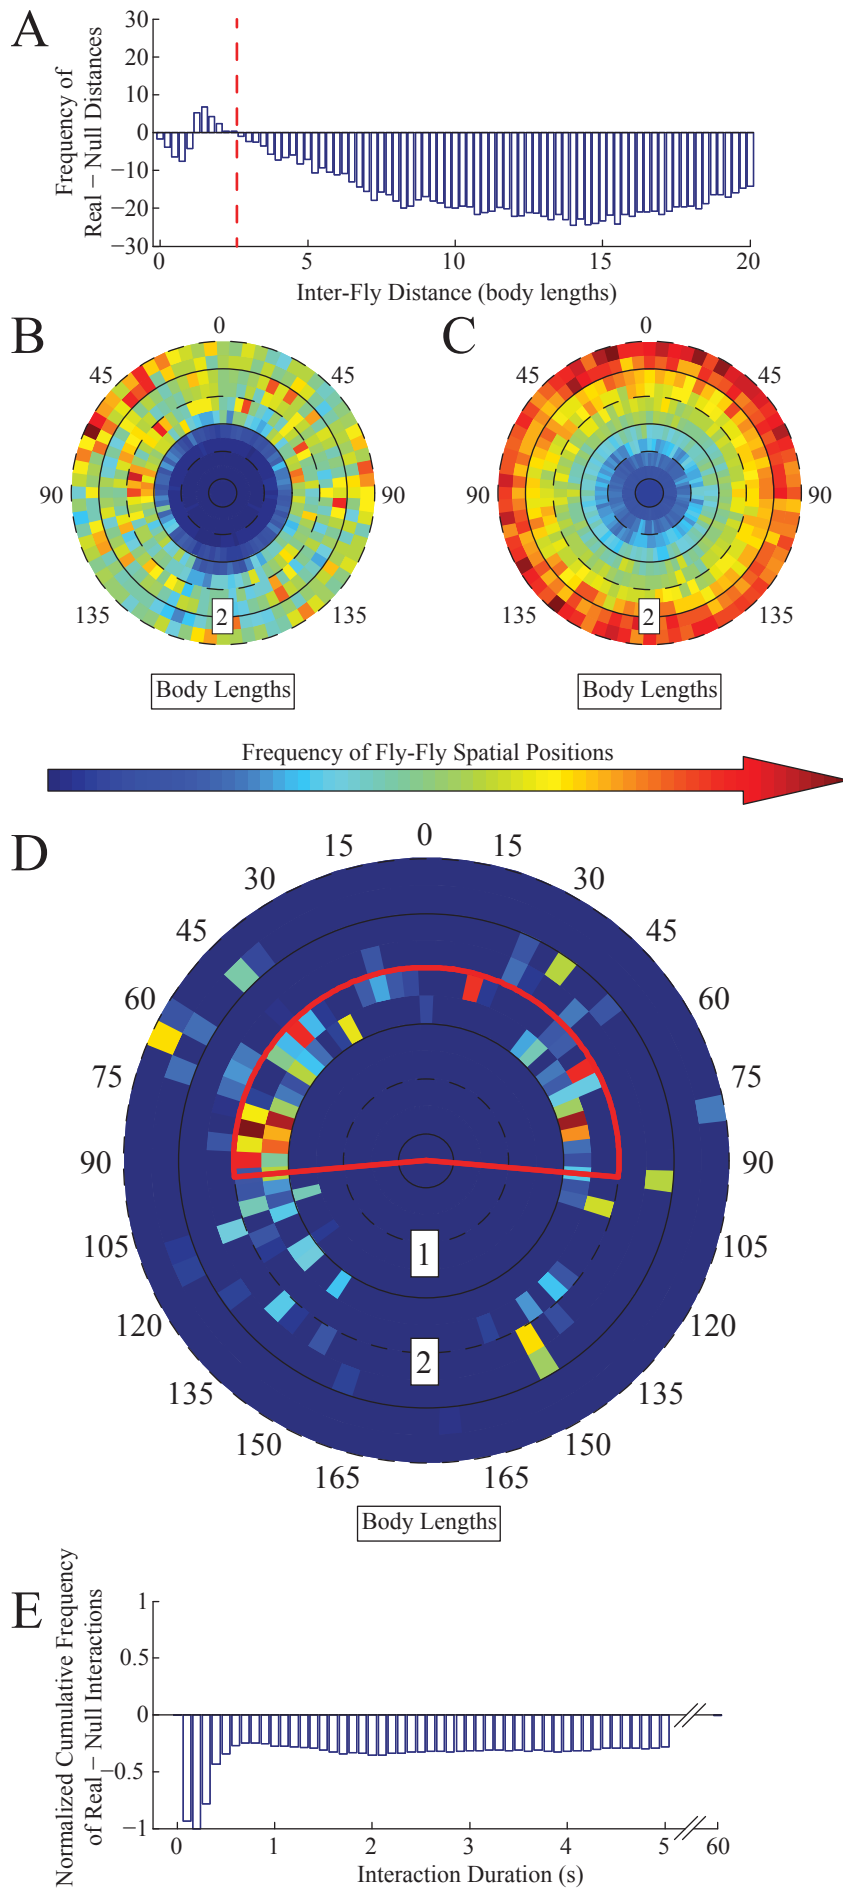

Figure S14

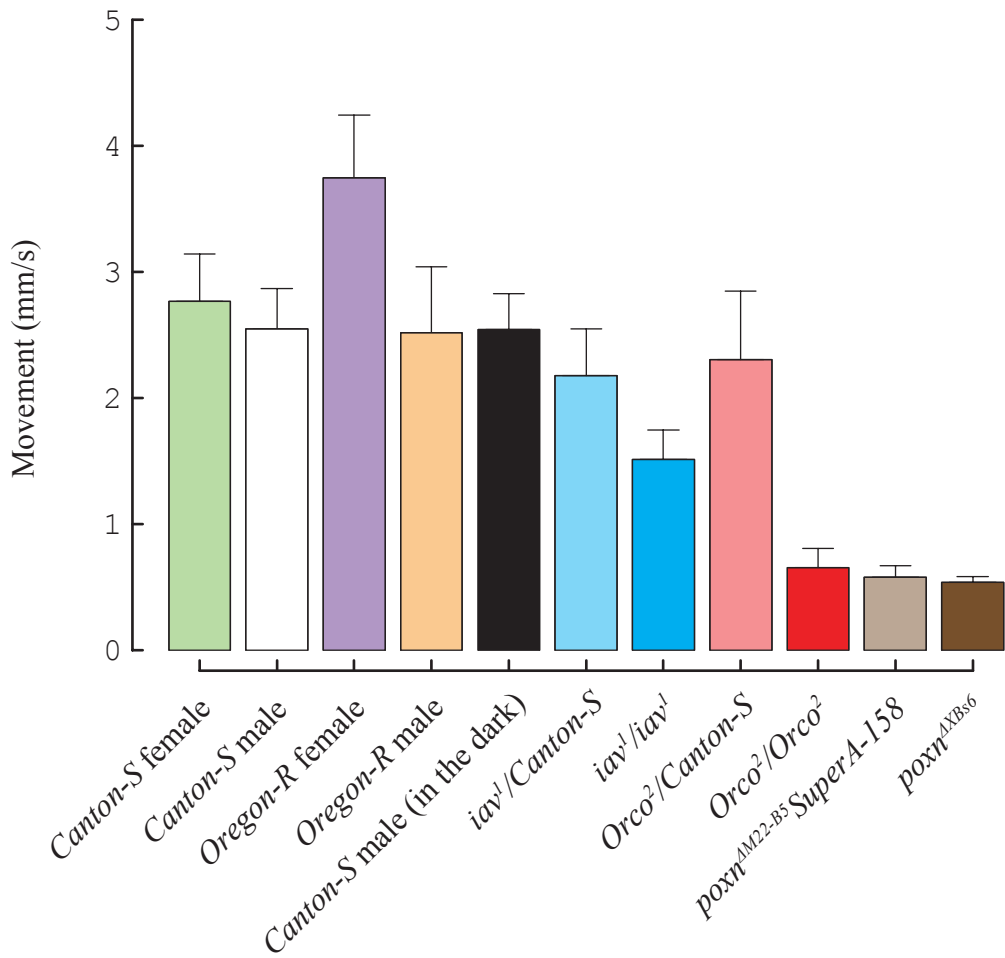

Supplement: rsbl20140749supp4.pdf [file rsbl20140749supp4.pdf]
